# Supplementary material for: Protocol for a prospective multicentre cohort study to develop and validate two new outcome measures for patients with inflammatory bowel disease
Source: PubMed Central journal article supplement — BMJ Open. 2013 Jul 9;3(7):e003192. doi: 10.1136/bmjopen-2013-003192 (PMC3710989; doi:10.1136/bmjopen-2013-003192), 2013-07-09
Supplement: bmjopen-2013-003192.draft_revisions.pdf [file bmjopen-2013-003192.draft_revisions.pdf]

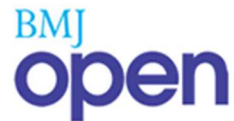

**Protocol for a prospective multicentre cohort study to develop and validate two new outcome measures for patients with inflammatory bowel disease.**

|                                 |                                                                                                                                                                        |
|---------------------------------|------------------------------------------------------------------------------------------------------------------------------------------------------------------------|
| Journal:                        | <i>BMJ Open</i>                                                                                                                                                        |
| Manuscript ID:                  | bmjopen-2013-003192                                                                                                                                                    |
| Article Type:                   | Protocol                                                                                                                                                               |
| Date Submitted by the Author:   | 09-May-2013                                                                                                                                                            |
| Complete List of Authors:       | Alrubaiy, Laith; Swansea University, College of Medicine<br>Williams, John; Swansea University, College of Medicine<br>Hutchings, Hayley; Swansea University, Medicine |
| <b>Primary Subject Heading</b>: | Gastroenterology and hepatology                                                                                                                                        |
| Secondary Subject Heading:      | Health services research, Health informatics                                                                                                                           |
| Keywords:                       | Inflammatory bowel disease < GASTROENTEROLOGY, Protocols & guidelines < HEALTH SERVICES ADMINISTRATION & MANAGEMENT, Gastroenterology < INTERNAL MEDICINE              |
|                                 |                                                                                                                                                                        |

SCHOLARONE™  
Manuscripts

1  
2  
3  
4 **Protocol for a prospective multicentre cohort study to develop and validate two new**  
5 **outcome measures for patients with inflammatory bowel disease.**  
6  
7  
8

9  
10  
11 L Alrubaiy\* , HA Hutchings, JG Williams  
12

13  
14  
15  
16 Centre for Health Information, Research and Evaluation (CHIRAL), Swansea University,  
17 Singleton Park, Swansea SA2 8PP  
18  
19

20  
21  
22  
23 Corresponding author:  
24

25 Dr. Laith Alrubaiy  
26

27 Room 220, Grove building  
28

29 College of Medicine  
30

31 Swansea University  
32

33 Swansea SA2 8PP  
34

35  
36 Email: [l.alrubaiy@swansea.ac.uk](mailto:l.alrubaiy@swansea.ac.uk)  
37

38 Tel: 0044 7809670683  
39  
40  
41

42 Keywords: Outcome measures, inflammatory bowel disease, health related quality of life ,  
43 disease severity index  
44  
45

46  
47 Words count: abstract 294 article 2410  
48  
49  
50  
51  
52  
53  
54  
55  
56  
57  
58  
59  
60

1  
2  
3 The Corresponding Author has the right to grant on behalf of all authors and does grant on  
4 behalf of all authors, an exclusive licence (or non-exclusive for government employees) on a  
5 worldwide basis to the BMJ Publishing Group Ltd and its Licensees to permit this article (if  
6 accepted) to be published in BMJ Open and any other BMJ PGL products to exploit all  
7 subsidiary rights, as set out in our licence  
8  
9  
10  
11 <http://group.bmj.com/products/journals/instructions-for-authors/licence-forms> and the  
12 Corresponding Author accepts and understands that any supply made under these terms is  
13 made by BMJ PGL to the Corresponding Author. All articles published in BMJ Open will be  
14 made available on an Open Access basis (with authors being asked to pay an open access fee -  
15 see <http://bmjopen.bmj.com/site/about/resources.xhtml> Access shall be governed by a  
16 Creative Commons licence – details as to which [Creative Commons](#) licence will apply to the  
17 article are set out in our licence referred to above.  
18  
19  
20  
21  
22  
23  
24  
25  
26  
27  
28  
29  
30  
31  
32  
33  
34  
35  
36  
37  
38  
39  
40  
41  
42  
43  
44  
45  
46  
47  
48  
49  
50  
51  
52  
53  
54  
55  
56  
57  
58  
59  
60

**Abstract:**

**Introduction:** Most of the health related quality of life (HRQoL) measures for patients with inflammatory bowel disease (IBD) were designed to be used in outpatient settings and are, therefore, not suitable for use in acute inpatient settings. None of the currently used clinical severity indices for patients with IBD have been properly validated. The aim of this study is to describe the development of a new health related quality of life questionnaire and a clinical severity index for patients with ulcerative colitis or Crohn's disease that are short, valid and suitable at any stage of their disease. These new outcome measurement tools will be easily used at the point of care, and invaluable monitoring tools for clinical care, audit and research.

**Methods and analysis:** This is a prospective multi-site validation study of two new outcome measures, the Crohn's and Colitis quality of life (CCQ) questionnaire and the Clinical IBD severity score (CISS). We plan to recruit patients with ulcerative colitis or Crohn's disease. Questionnaire items will be selected through extensive literature review and a focus group involving patients, methodologists, statisticians and IBD specialists. The CCQ questionnaire will be completed by patients attending IBD clinics, having endoscopy procedures or when admitted to hospital. The CISS will be completed by clinicians while assessing patients with IBD. Psychometric analysis will be carried out to test the validity and the reliability of the questionnaires and determine the potential to produce shorter versions of CISS and CCQ. The construct validity of the CCQ will be tested against short form-12 (SF12) and the European Quality of Life Five Dimensions (EQ5D). The construct validity of CISS will be tested against biochemical markers, clinical and endoscopic indices to assess severity.

**Ethics:** This study was approved by the South East Wales Research Ethics Committee (Ref 11/WA/0239).

1  
2  
3 **Article summary:**  
4  
5

6 Article focus:  
7

- 8 • None of the currently used clinical severity indices for patients with inflammatory  
9 bowel disease (IBD) have been properly validated.
- 10 • Most of the health related quality of life (HRQoL) measures for patients with IBD  
11 have been designed for use in outpatient settings and are, therefore, not suitable for  
12 use in acute inpatient settings
- 13 • This article describes the protocol for a prospective multi-site validation study of two  
14 new outcome measures; the Crohn's and Colitis Health related quality of life (CCQ)  
15 questionnaire and the Clinical IBD severity score (CISS).  
16  
17  
18  
19  
20

21 Key measures:  
22

- 23 • The main focus of the article is the development and validation of two outcome  
24 measures to assess the quality of life and disease severity of patients with IBD.
- 25 • This article provides an insight into the methods used to develop and validate new  
26 outcome measures which can applied to any disease.  
27  
28  
29  
30

31 Strength and limitations of this study:  
32

- 33 • The CISS will be the first fully validated clinical severity index for patients with IBD.
- 34 • The CCQ will be the first health related quality of life tool that will be applicable to all  
35 types and presentations of IBD.
- 36 • It may be difficult to recruit adequate numbers of patients with less common  
37 presentations of IBD like perianal Crohn's disease or patients with extra-intestinal  
38 manifestations.  
39  
40  
41  
42  
43  
44  
45  
46  
47  
48  
49  
50  
51  
52  
53  
54  
55  
56  
57  
58  
59  
60

## Introduction:

Inflammatory bowel disease (IBD) affects approximately one person in every 250 in the United Kingdom population<sup>1</sup>. The cost of IBD to the NHS has been estimated at about £720 million per annum, based on the prevalence and an average cost of £3,000 per year per patient<sup>2</sup>. The lifetime medical costs associated with the care of IBD are comparable with major chronic diseases such as diabetes mellitus or cancer<sup>2</sup>. Anti Tumour Necrosis factor  $\alpha$  (Anti TNF- $\alpha$ ) drugs are new and effective biological treatments for both ulcerative colitis<sup>3</sup> and Crohn's disease<sup>4</sup> but long-term outcomes are still unknown and there are a number of safety issues<sup>5</sup>. Therefore, the National Institute for Health and Clinical Excellence (NICE) has recommended the establishment of a Registry for patients with IBD treated with biological therapy<sup>6</sup>. Assessment of response to treatment will require measurement of both HRQoL and disease severity.

HRQoL questionnaires are often employed as measures of health status and are important outcome measures in clinical trials. They should form an integral part of any outcome monitoring efforts but are often omitted from large scale registries because of constraints on the amount of data these registries can collect. To facilitate adoption of HRQoL measures in large IBD registries, it is important to develop instruments which are short and easy to complete, yet valid, reliable and applicable to all IBD patients.

IBD has a great impact on the quality of life as it is not curable and follows an unpredictable relapsing and remitting course with significant variation in the pattern and complexity of symptoms that may affect each patient, sometimes leading to hospital admission, surgery and bowel resection, which may leave the patient with a stoma. There are several specific HRQoL measurement tools for patients with inflammatory bowel disease<sup>7, 8, and 9</sup>. However, all of them have been designed for use in the outpatient setting with stable patients and there is no HRQoL instrument that is validated for use both in the community and by patients who are acutely ill, have a stoma or perianal disease.

In clinical practice, assessing disease severity is an important part of IBD management and a standardized and quantitative evaluation of the severity of IBD is needed for the registry. Due to the varied presentations of IBD, a number of clinical indices have been put forward using different parameters which are based on different principles<sup>10, 11</sup>. In order to be widely utilised and generalisable, the index should include as few items as possible which are easily obtainable in any clinical setting and applicable to the majority of patients. An index should also possess the required psychometric properties such as validity and reliability<sup>15</sup>. In IBD,

1  
2  
3 there are several different disease severity indices available<sup>10, 11</sup>. However, none of them have  
4 been properly validated. Therefore, for a successful IBD registry, there is a need for a short  
5 yet reliable and valid severity score index to assess response to treatment and to detect early  
6 relapse for all types and presentations of IBD.  
7  
8  
9

### 10 11 **Aim:**

12 The aim of the study is to develop valid and reliable HRQoL and a disease severity  
13 measurement tools that are suitable for use with patients at any stage of their IBD. These tools  
14 will be easily recorded at the point of care to support their use for a registry of patients with  
15 IBD.  
16  
17  
18  
19

### 20 21 **Objectives of the study:**

- 22  
23  
24  
25 1. To validate a HRQoL questionnaire (Crohn's and Colitis Quality of Life (CCQ)  
26 questionnaire) and derive a short form (Short CCQ) that is suitable for acute and stable  
27 patients with IBD and covers patients with a stoma or fistula.  
28  
29 2. To validate a single clinical severity index (Clinical IBD severity index (CISS)) and  
30 derive a short form that is suitable for all types and presentations of IBD.  
31  
32  
33

### 34 35 **Methods and analysis:**

#### 36 37 38 **Developing the outcome measures:**

##### 39 40 41 **1. The Crohn's and Colitis Health related quality of life questionnaire**

42 The initial version of the Crohn's and Colitis Health related quality of life questionnaire  
43 (CCQ) will be based on the UK Inflammatory Bowel Disease Questionnaire (UK IBDQ)<sup>9</sup>  
44 that was developed and validated in 2000. An extensive literature review will be carried out to  
45 identify supplementary items to reflect the wide range and frequency of symptoms of IBD  
46 when patients are seen as outpatients, inpatients, with perianal disease and with a stoma. The  
47 first draft of CCQ will be as inclusive as possible to cover all patients with IBD. We will  
48 validate the CCQ with a wider group of patients to include patients with both Crohn's disease  
49 (CD) and Ulcerative colitis (UC) as well as patients with a stoma and Crohn's perianal  
50 disease. The questionnaire will be examined by IBD specialists, methodologists and  
51 statisticians to ensure good face and content validity of the items. To ensure that the resulting  
52  
53  
54  
55  
56  
57  
58  
59  
60

questionnaire is clear to patients, we will conduct a feasibility study, asking a small sample of patients to complete the questionnaires.

## 2. The Clinical IBD Severity Score (CISS)

The development of Clinical IBD Severity Score (CISS) will follow a clinimetric approach<sup>12</sup>,<sup>13</sup>. Items will be selected through reviewing 17 existing clinical severity indices commonly used in studies for UC and CD (Table 1). To ensure the selected items are applicable to patients with IBD, a focus group of IBD specialists, statisticians and methodologists will review these items and ensure good face and content validity. The CISS will assess the acute and chronic severity of IBD. It will have supplementary questions for perianal disease (to be used when applicable). The CISS will be the first clinical severity index to include all presentations of patients with IBD in one single index.

### Recruitment:

This is a prospective multi-centre study which will be carried out over a 3 year period. We will recruit patients with Ulcerative colitis (UC) or Crohn's disease (CD). Patients' medical records will be reviewed to confirm their eligibility as below:

### Inclusion criteria:

1. Confirmed diagnosis of UC, Crohn's disease or indeterminate colitis
2. Age 18 years and above
3. Not in a vulnerable group (such as people with mental illness or memory problems, learning difficulties, or physical disabilities)
4. Able to consent.

### Exclusion criteria:

1. Patients without a definite diagnosis of UC, Crohn's disease or indeterminate colitis
2. Age less than 18 years
3. Patients within a vulnerable group (such as people with mental illness or memory problems, learning difficulties, or physical disabilities)
4. Unable to consent



1  
2  
3 If patients meet the inclusion criteria, they will be invited to participate in the study when they  
4 attend outpatients or are admitted to hospital. Patients will be asked to give written consent  
5 following an oral and written explanation of the study.  
6  
7

8 The long version of Crohn's and Colitis Quality of life (CCQ) questionnaire will be  
9 completed by patients while they are in hospital, in outpatients or at home. Patients will also  
10 complete the generic Short Form 12 (SF12)<sup>14</sup> and EuroQoL (EQ5D)<sup>15</sup> questionnaires. They  
11 will be asked to complete the same questionnaires within 6 weeks after the initial completion  
12 to check test-retest reliability and responsiveness.  
13  
14

15 The clinical IBD severity score (CISS) will be recorded by the health care professionals when  
16 reviewing patients in clinic or on the ward. CISS will be recorded again within 6 weeks after  
17 the initial completion in order to check CISS test-retest reliability and responsiveness.  
18  
19  
20  
21

### 22 **Sample size:**

23 When validating a questionnaire it is important that the sample used is representative of the  
24 population in which the instrument is to be used. There are no general criteria for the required  
25 sample size in a validation study<sup>13</sup>, which is typically based on the assumption that the  
26 number of respondents should exceed the number of items in the questionnaire by at least a  
27 factor of three<sup>22</sup>. Some authors suggest that rather than the overall sample size it is the ratio of  
28 subjects to items that is important and recommends a 10 to 1 ratio for each item<sup>23</sup>. We anticipate  
29 the CISS will have 17 different items and the CCQ will have 32 different items. We will  
30 therefore aim to recruit a minimum of 170 patients and 320 patients for the validation study of  
31 initial versions of CISS and CCQ respectively.  
32  
33  
34  
35  
36  
37  
38  
39

### 40 **Psychometric analysis:**

41 Data will be analysed using the Statistical Package for Social Sciences (SPSS) version 19  
42 licensed for Swansea University. The main components of psychometric analysis will be:  
43  
44  
45  
46  
47

#### 48 **1. Internal consistency**

49 The internal consistency is a measure of reliability. It measures the degree of correlation  
50 between different items in the scale. Internal consistency will be assessed by item-total  
51 correlations and Cronbach  $\alpha$ . Items with item total correlation below 0.2 or more than 0.8 will  
52 be rejected<sup>12,13</sup> as they add little information to the scale. Items will also be considered for  
53 rejection if more than 80% or less than 20% of patients gave the same response because they  
54  
55  
56  
57  
58  
59  
60

won't be able to differentiate different levels of severity. Items that are ambiguous or found difficult to be answered will be considered for removal or re-wording. Cronbach  $\alpha$  of the resulting scale should be  $> 0.7$ <sup>13</sup>. Item discrimination power which is the ability of items to discriminate between patients with different level of severity should be  $>0.4$ <sup>13</sup> otherwise it will be considered for rejection. We will carry out stepwise regression of the total scores on the individual items and will select the items that represent 95% of the variation in the scores to produce short versions of the CCQ and CISS<sup>13</sup>.

## 2. Validity

Construct validity refers to the correlation of the scale with other instruments that are believed to assess the same attribute with high degrees of validity and reliability<sup>13</sup>. It is commonly measured using Pearson correlation coefficient ( $r$ ). Construct validity will be accepted if Pearson correlation is  $0.4 - 0.8$ <sup>12, 13</sup>. Lower correlations mean either one of the tests has low validity or the two tests are measuring different phenomena while high correlations means the two tests are very similar and the new scale is not needed. Construct validity of CCQ will be assessed using Short Form 12 (SF12)<sup>14</sup> and EuroQoL (EQ5D)<sup>15</sup>. Construct validity of CISS will be checked using biochemical markers: C-reactive protein, white cell count, haemoglobin, albumin and clinical indices: Harvey Bradshaw index<sup>16</sup> (for Crohn's disease), Simple clinical colitis activity index<sup>17</sup> (for Ulcerative colitis) and perianal disease activity index<sup>18</sup> (for perianal Crohn's disease). When patients undergo endoscopy the following endoscopic indices will be recorded: Mayo clinic score<sup>19</sup>, Rachmilewitz scores<sup>20</sup> in UC and simple endoscopic score<sup>21</sup> in CD.

## 3. Test-retest reliability or reproducibility

Reproducibility is used to assess reliability of the test applied on two occasions. To measure reproducibility, CCQ and CISS will be administered to 20% of patients in two occasions. There should be no overall change in their clinical condition between these two intervals. For CCQ, patients will be asked if their health has changed since they last filled the questionnaires. For CISS, we will use physician global assessment to assess if patients' conditions have changed or not. Patients with no change will be included in the reproducibility analysis using intra-class correlation coefficient. For practical reasons, we will allow a maximum of 6 weeks after the first assessment or since the first questionnaire was completed. A value of intra-class correlation of  $0.75$ <sup>12, 13</sup> will be accepted.

#### 4. Responsiveness:

Responsiveness is the ability to detect change. This will be computed by applying CCQ and CISS to 20% of patients in two occasions. For CCQ, patients will be asked if their health has changed since they last filled the questionnaires. For CISS, we will use physician global assessment to assess if patients' conditions have changed or not. Patients whose clinical conditions have changed will be included in the responsiveness analysis using the responsiveness ratio. Responsiveness ratio will be calculated by dividing the mean change in scores for patients who reported a change with the standard deviation of the scores of those who remained stable<sup>13</sup>. A ratio more than 0.5 will be accepted<sup>12,13</sup>. For practical reasons, we will allow a maximum of 6 weeks after the first assessment or since the first questionnaire was completed.

#### 5. Inter-Observer Reliability:

This is a measure of reliability to assess the degree of consistency between different observers. We will check the inter-observer reliability of CISS on 20% of patients using inter-class correlation. Two observers will use CISS to assess the same group of patients. We will divide the patients into 2 groups. First group will be assessed by a physician and a specialist nurse while the second group will be assessed by two physicians. A correlation of > 0.75 will be acceptable<sup>13</sup>.

#### Ethics and dissemination:

This study has been approved by the South East Wales Research Ethics Committee (Reference 11/WA/0239). NHS code of confidentiality and Data protection will be adhered to. Once patients are identified, all personal details will be anonymised. Only study related staff will have access to the data. Access will be permitted to appropriately qualified personnel and in accordance with the data protection Act 1998. All data acquisition, storage and transmission will comply with Data Protection Act.

We are committed to publishing our results as widely as possible in peer reviewed journals and to ensuring that appropriate recognition is given to everyone who works on the study.

**Authors' contributions:** LA is the chief investigator of the study. He contributed in writing the protocol, designing the questionnaires, data analysis and analysis. JGW and HH contributed to designing the questionnaires, all drafts of the protocol and data analysis.

**Funding statement:** This work was supported by the Welsh Clinical Academic training (WCAT) scheme and is collaboration between Swansea University and Wales deanery.

**Competing interests:** None.

**Appendices:**

**Table 1: The commonly used clinical severity indices in literature**

**Ulcerative Colitis:**

1. Truelove and Witts severity index <sup>24</sup>
2. Powell Tuck index <sup>25</sup>
3. Simple clinical colitis severity index <sup>17</sup>
4. Lichtiger score <sup>26</sup>
5. Clinical Activity Index (CAI) <sup>20</sup>
6. Physician global assessment <sup>27</sup>
7. Improvement based on individual symptom score <sup>28</sup>
8. Ulcerative colitis clinical severity score <sup>29</sup>
9. Seo Score <sup>30</sup>
10. Mayo Clinic activity score <sup>19</sup>

**Crohn's disease:**

1. Crohn's disease activity index <sup>31</sup>
2. Harvey Bradshaw index <sup>16</sup>
3. Van Hees index <sup>32</sup>
4. The Cape Town Index <sup>33</sup>
5. Fistula Drainage assessment <sup>34</sup>
6. Perianal Disease Activity Index (PDAI) <sup>35</sup>
7. Perianal Crohn's disease Activity Index (PCDAI) <sup>18</sup>

## References

1. National Association for Colitis and Crohn's Disease. Inflammatory bowel disease basics. <http://www.nacc.org.uk/content/ibd.asp> (accessed 20th October 2010)
2. IBD Standards Group. Quality care. Service standards for the healthcare of people who have Inflammatory Bowel Disease (IBD). 2009. [Accessed on 12 May, 2009]; Available from [www.ibdstandards.org.uk/](http://www.ibdstandards.org.uk/).
3. Rutgeerts P, Sandborn WJ, Feagan BG, Reinisch W, Olson A, Johanns J, Travers S, Rachmilewitz D, Hanauer SB, Lichtenstein GR, de Villiers WJ, Present D, Sands BE, Colombel JF. Infliximab for Induction and Maintenance Therapy for Ulcerative Colitis. *N Engl J Med* 2005; 353:2462-2476
4. Hanauer SB, Feagan BG, Lichtenstein GR, Mayer LF, Schreiber S, Colombel JF, Rachmilewitz D, Wolf DC, Olson A, Bao W, Rutgeerts P; ACCENT I Study Group. Maintenance infliximab for Crohn's disease: the ACCENT I randomised trial. *Lancet*. 2002 May 4; 359(9317):1541-9.
5. Ferkolj I. How to improve the safety of biologic therapy in Crohn's disease. 2009. *J Physiol Pharmacol. Suppl* 7:67-70.
6. National Institute for Health and Clinical Excellence. Crohn's disease - Infliximab (review) and Adalimumab, TA187 (review of TA40). London. 2010
7. Irvine EJ. Health related quality of life of patients with ulcerative colitis: past, present, and future. *Inflamm Bowel Dis*. 2008 Apr;14(4):554-65.
8. Mitchell A, Guyatt G, Singer J, Irvine EJ, Goodacre R, Tompkins C, Williams N, Wagner F. Health related quality of life in patients with inflammatory bowel disease. *J Clin Gastroenterol*. 1988 Jun;10(3):306-10.
9. Cheung WY, Garratt AM, Russell IT, Williams JG. The UK IBDQ-a British version of the inflammatory bowel disease questionnaire. Development and validation. *J Clin Epidemiol*. 2000 Mar 1;53(3):297-306.
10. D'Haens G, Sandborn WJ, Feagan BG, Geboes K, Hanauer SB, Irvine EJ, Lémann M, Marteau P, Rutgeerts P, Schölmerich J, Sutherland LR. A review of severity indices and efficacy end points for clinical trials of medical therapy in adults with ulcerative colitis. *Gastroenterology*. 2007 Feb;132(2):763-86.
11. Sandborn WJ, Feagan BG, Hanauer SB, Lochs H, Löfberg R, Modigliani R, Present DH, Rutgeerts P, Schölmerich J, Stange EF, Sutherland LR. A review of severity

- 1  
2  
3 indices and efficacy endpoints for clinical trials of medical therapy in adults with  
4 Crohn's disease. *Gastroenterology*. 2002 Feb;122(2):512-30
- 5  
6 12. Marx RG, C Bombardier C, Hogg-Johnson S, Wright JG. Clinimetric and  
7 psychometric strategies for development of a health measurement scale. *J Clin*  
8 *Epidemiol*, 1999. 52(2): p. 105-11
- 9  
10 13. Streiner DL, Norman GR. Health measurement scales. A practical guided to their  
11 development uses. 4<sup>th</sup> ed, 2008 OUP.
- 12  
13 14. Ware J Jr, Kosinski M, Keller SD. A 12-Item Short-Form Health Survey: construction  
14 of scales and preliminary tests of reliability and validity. *Med Care* 1996; 34:220-33.
- 15  
16 15. EuroQoL Group. EuroQoL: a new facility for the measurement of heath-related  
17 quality of life. *Health Policy* 1990. 16:199–208
- 18  
19 16. Harvey RF, Bradshaw JM. A simple index of Crohn's disease activity. *Lancet*  
20 1980;1:514.
- 21  
22 17. Walmsley RS, Ayres RC, Pounder RE, Allan RN. A simple clinical colitis activity  
23 index. *Gut*. 1998 Jul;43(1):29-32.
- 24  
25 18. Irvine EJ. Usual therapy improves perianal Crohn's disease as measured by a  
26 new disease activity index. McMaster IBD Study Group. *J Clin Gastroenterol*  
27 1995;20:27-32.
- 28  
29 19. Schroeder KW, Tremaine WJ, Ilstrup DM. Coated oral 5-aminosalicylic acid therapy  
30 for mildly to moderately active ulcerative colitis. A randomized study. *N Engl J Med*.  
31 1987 Dec 24;317(26):1625-9.
- 32  
33 20. Rachmilewitz D. Coated mesalazine (5-aminosalicylic acid) versus sulphasalazine in  
34 the treatment of active ulcerative colitis: a randomised trial. *BMJ*. 1989 Jan  
35 14;298(6666):82-6.
- 36  
37 21. Daperno M, D'Haens G, Van Assche G, Baert F, Bulois P, Maunoury V, Sostegni R,  
38 Rocca R, Pera A, Gevers A, Mary JY, Colombel JF, Rutgeerts P. Development and  
39 validation of a new, simplified endoscopic activity score for Crohn's disease: the SES-  
40 CD. *Gastrointest Endosc*. 2004 Oct;60(4):505-12.
- 41  
42 22. Barrett P, Kline P. The observation to variable ratio in factor analysis. *J Personality*  
43 *Group Behaviour* 1981;1:23-33.
- 44  
45 23. Nunnally, J C . *Psychometric theory* 1978. New York : McGraw-Hill
- 46  
47 24. Truelove SC, Witts LJ. Cortisone in ulcerative colitis; final report on a therapeutic  
48 trial. *Br Med J*. 1955 Oct 29;2(4947):1041-8.
- 49  
50  
51  
52  
53  
54  
55  
56  
57  
58  
59  
60

- 1  
2  
3 25. Powell-Tuck J, Day DW, Buckell NA, Wadsworth J, Lennard-Jones JE. Correlations  
4 between defined sigmoidoscopic appearances and other measures of disease activity in  
5 ulcerative colitis. *Dig Dis Sci.* 1982 ;27(6):533-7.  
6  
7
- 8 26. Lichtiger S, Present DH. Preliminary report: cyclosporin in treatment of severe active  
9 ulcerative colitis. *Lancet.* 1990 Jul 7;336(8706):16-9.  
10
- 11 27. Hanauer S, Schwartz J, Robinson M, Roufail W, Arora S, Cello J, Safdi M.  
12 Mesalamine capsules for treatment of active ulcerative colitis: results of a controlled  
13 trial. Pentasa Study Group. *Am J Gastroenterol.* 1993 Aug;88(8):1188-97  
14
- 15 28. Levine DS, Riff DS, Pruitt R, Wruble L, Koval G, Sales D, Bell JK, Johnson LK. A  
16 randomized, double blind, dose-response comparison of balsalazide (6.75 g),  
17 balsalazide (2.25 g), and mesalamine (2.4 g) in the treatment of active, mild-to-  
18 moderate ulcerative colitis. *Am J Gastroenterol.* 2002 Jun;97(6):1398-407.  
19  
20
- 21 29. Feagan BG, Greenberg GR, Wild G, Fedorak RN, Paré P, McDonald JW, Dubé R,  
22 Cohen A, Steinhart AH, Landau S, Aguzzi RA, Fox IH, Vandervoort MK. Treatment  
23 of ulcerative colitis with a humanized antibody to the alpha4beta7 integrin. *N Engl J*  
24 *Med.* 2005 Jun 16;352(24):2499-507.  
25  
26
- 27 30. Seo M, Okada M, Yao T, Ueki M, Arima S, Okumura M. An index of disease activity  
28 in patients with ulcerative colitis. *Am J Gastroenterol.* 1992 Aug;87(8):971-6.  
29  
30
- 31 31. Best WR, Beckett JM, Singleton JW, Kern F Jr. Development of a Crohn's disease  
32 activity index. National Cooperative Crohn's Disease Study. *Gastroenterology* 19  
33 76 ; 70 : 439 - 444 .  
34  
35
- 36 32. van Hees PA, van Elteren PH, van Lier H J, van Tongeren JH. An index of  
37 inflammatory activity in patients with Crohn's disease. *Gut* 1980;21:279-286.  
38  
39
- 40 33. Wright JP, Marks IN, Parfitt A. A simple clinical index of Crohn's disease activity-  
41 the Cape Town index. *S Afr Med J* 1985;68: 502-503.  
42  
43
- 44 34. Present DH, Rutgeerts P, Targan S, Hanauer SB, Mayer L, van Hogezaand RA,  
45 Podolsky DK, Sands BE, Braakman T, DeWoody KL, Schaible TF, van Deventer  
46 SJ. Infliximab for the treatment of fistulas in patients with Crohn's disease. *N*  
47 *Engl J Med* 1999;340:1398 -1405.  
48  
49
- 50 35. Pikarsky AJ, Gervaz P, Wexner SD. Perianal Crohn disease: a new scoring system to  
51 evaluate and predict outcome of surgical intervention. *Arch Surg.* 2002 Jul;137(7):774-7  
52  
53  
54  
55  
56  
57  
58  
59  
60

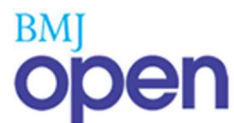

**Protocol for a prospective multicentre cohort study to develop and validate two new outcome measures for patients with inflammatory bowel disease.**

|                                 |                                                                                                                                                                        |
|---------------------------------|------------------------------------------------------------------------------------------------------------------------------------------------------------------------|
| Journal:                        | <i>BMJ Open</i>                                                                                                                                                        |
| Manuscript ID:                  | bmjopen-2013-003192.R1                                                                                                                                                 |
| Article Type:                   | Protocol                                                                                                                                                               |
| Date Submitted by the Author:   | 14-Jun-2013                                                                                                                                                            |
| Complete List of Authors:       | Alrubaiy, Laith; Swansea University, College of Medicine<br>Hutchings, Hayley; Swansea University, Medicine<br>Williams, John; Swansea University, College of Medicine |
| <b>Primary Subject Heading</b>: | Gastroenterology and hepatology                                                                                                                                        |
| Secondary Subject Heading:      | Health services research, Health informatics                                                                                                                           |
| Keywords:                       | Inflammatory bowel disease < GASTROENTEROLOGY, Protocols & guidelines < HEALTH SERVICES ADMINISTRATION & MANAGEMENT, Gastroenterology < INTERNAL MEDICINE              |
|                                 |                                                                                                                                                                        |

SCHOLARONE™  
Manuscripts



1  
2  
3  
4  
5 **Protocol for a prospective multicentre cohort study to develop and validate two new**  
6  
7 **outcome measures for patients with inflammatory bowel disease.**  
8  
9

10  
11  
12  
13  
14 L Alrubaiy\* , HA Hutchings, JG Williams  
15

16  
17  
18  
19  
20  
21 Centre for Health Information, Research and Evaluation (CHIRAL), Swansea University,  
22  
23 Singleton Park, Swansea SA2 8PP  
24  
25

26  
27  
28  
29 Corresponding author:  
30

31 Dr. Laith Alrubaiy  
32

33 Room 220, Grove building  
34

35 College of Medicine  
36

37 Swansea University  
38

39 Swansea SA2 8PP  
40

41 Email: l.alrubaiy@swansea.ac.uk  
42

43 Tel: 0044 7809670683  
44  
45  
46  
47  
48

49  
50 Keywords: Outcome measures, inflammatory bowel disease, health related quality of life ,  
51  
52 disease severity index  
53  
54

55  
56 Words count: Abstract 294. Main article 2575  
57  
58  
59  
60

1  
2  
3 The Corresponding Author has the right to grant on behalf of all authors and does grant on  
4  
5 behalf of all authors, an exclusive licence (or non-exclusive for government employees) on a  
6  
7 worldwide basis to the BMJ Publishing Group Ltd and its Licensees to permit this article (if  
8  
9 accepted) to be published in BMJ Open and any other BMJ PGL products to exploit all  
10  
11 subsidiary rights, as set out in our licence  
12  
13 (<http://group.bmj.com/products/journals/instructions-for-authors/licence-forms>) and the  
14  
15 Corresponding Author accepts and understands that any supply made under these terms is  
16  
17 made by BMJ PGL to the Corresponding Author. All articles published in BMJ Open will be  
18  
19 made available on an Open Access basis (with authors being asked to pay an open access fee -  
20  
21 see <http://bmjopen.bmj.com/site/about/resources.xhtml> Access shall be governed by a  
22  
23 Creative Commons licence – details as to which Creative Commons licence will apply to the  
24  
25 article are set out in our licence referred to above.  
26  
27  
28  
29  
30  
31  
32  
33  
34  
35  
36  
37  
38  
39  
40  
41  
42  
43  
44  
45  
46  
47  
48  
49  
50  
51  
52  
53  
54  
55  
56  
57  
58  
59  
60

**Abstract:**

**Introduction:** Most of the health related quality of life (HRQoL) measures for patients with inflammatory bowel disease (IBD) were designed to be used in outpatient settings and are, therefore, not suitable for use in acute inpatient settings. None of the currently used clinical severity indices for patients with IBD have been properly validated. The aim of this study is to describe the development of a new health related quality of life questionnaire and a clinical severity index for patients with ulcerative colitis or Crohn's disease that are short , valid and suitable at any stage of their disease. These new outcome measurement tools will be easily used at the point of care, and invaluable monitoring tools for clinical care, audit and research.

**Methods and analysis:** This is a prospective multi-site validation study of two new outcome measures, the Crohn's and Colitis quality of life (CCQ) questionnaire and the Clinical IBD severity score (CISS). We plan to recruit patients with ulcerative colitis or Crohn's disease. Questionnaire items will be selected through extensive literature review and a focus group involving patients, methodologists, statisticians and IBD specialists. The CCQ questionnaire will be completed by patients attending IBD clinics, having endoscopy procedures or when admitted to hospital. The CISS will be completed by clinicians while assessing patients with IBD. Psychometric analysis will be carried out to test the validity and the reliability of the questionnaires and determine the potential to produce shorter versions of CISS and CCQ. The construct validity of the CCQ will be tested against short form-12 (SF12) and the European Quality of Life Five Dimensions (EQ5D). The construct validity of CISS will be tested against biochemical markers, clinical and endoscopic indices to assess severity.

**Ethics:** This study was approved by the South East Wales Research Ethics Committee (Ref 11/WA/0239).

1  
2  
3 **Article summary:**  
4

5 Article focus:  
6

- 7
- 8 • None of the currently used clinical severity indices for patients with inflammatory  
9 bowel disease (IBD) have been properly validated.  
10
  - 11 • Most of the health related quality of life (HRQoL) measures for patients with IBD  
12 have been designed for use in outpatient settings and are, therefore, not suitable for  
13 use in acute inpatient settings  
14
  - 15 • This article describes the protocol for a prospective multi-site validation study of two  
16 new outcome measures; the Crohn's and Colitis Health related quality of life (CCQ)  
17 questionnaire and the Clinical IBD severity score (CISS).  
18  
19  
20  
21  
22  
23  
24

25 Key measures:  
26

- 27
- 28 • The main focus of the article is the development and validation of two outcome  
29 measures to assess the quality of life and disease severity of patients with IBD.  
30
  - 31 • This article provides an insight into the methods used to develop and validate new  
32 outcome measures which can applied to any disease.  
33  
34  
35  
36  
37  
38

39 Strength and limitations of this study:  
40

- 41
- 42 • The CISS will be the first fully validated clinical severity index for patients with IBD.  
43
  - 44 • The CCQ will be the first health related quality of life tool that will be applicable to all  
45 types and presentations of IBD.  
46
  - 47 • It may be difficult to recruit adequate numbers of patients with less common  
48 presentations of IBD like perianal Crohn's disease or patients with extra-intestinal  
49 manifestations.  
50  
51  
52  
53  
54  
55  
56  
57  
58  
59  
60

**Introduction:**

Inflammatory bowel disease (IBD) affects approximately one person in every 250 in the United Kingdom population<sup>1</sup>. The cost of IBD to the NHS has been estimated at about £720 million per annum, based on the prevalence and an average cost of £3,000 per year per patient<sup>2</sup>. The lifetime medical costs associated with the care of IBD are comparable with major chronic diseases such as diabetes mellitus or cancer<sup>2</sup>. Anti Tumour Necrosis factor  $\alpha$  (Anti TNF- $\alpha$ ) drugs are new and effective biological treatments for both ulcerative colitis<sup>3</sup> and Crohn's disease<sup>4</sup> but long-term outcomes are still unknown and there are a number of safety issues<sup>5</sup>. Therefore, the National Institute for Health and Clinical Excellence (NICE) has recommended the establishment of a Registry for patients with IBD treated with biological therapy<sup>6</sup>. Assessment of response to treatment will require measurement of both HRQoL and disease severity.

HRQoL questionnaires are often employed as measures of health status and are important outcome measures in clinical trials. They should form an integral part of any outcome monitoring efforts but are often omitted from large scale registries because of constraints on the amount of data these registries can collect. To facilitate adoption of HRQoL measures in large IBD registries, it is important to develop instruments which are short and easy to complete, yet valid, reliable and applicable to all IBD patients.

IBD has a great impact on the quality of life as it is not curable and follows an unpredictable relapsing and remitting course with significant variation in the pattern and complexity of symptoms that may affect each patient, sometimes leading to hospital admission, surgery and bowel resection, which may leave the patient with a stoma. There are several specific HRQoL measurement tools for patients with inflammatory bowel disease<sup>7, 8, and 9</sup>. However, all of them have been designed for use in the outpatient setting with stable patients and there is no

1  
2  
3 HRQoL instrument that is validated for use both in the community and by patients who are  
4  
5 acutely ill, have a stoma or perianal disease.  
6

7  
8 In clinical practice, assessing disease severity is an important part of IBD management and a  
9  
10 standardized and quantitative evaluation of the severity of IBD is needed for the registry. Due  
11  
12 to the varied presentations of IBD, a number of clinical indices have been put forward using  
13  
14 different parameters which are based on different principles<sup>10, 11</sup>. Currently available disease  
15  
16 severity indices measure disease severity at a single point of time rather than over a longer  
17  
18 time period which is an important outcome to assess quality of care. Therefore, a new index  
19  
20 that assesses the chronic severity of IBD over a long period of time is needed. A recently  
21  
22 reported disability measurement tool for patients with IBD has good correlation with other  
23  
24 quality of life and disease severity tools, but has not been validated on acutely unwell  
25  
26 patients, only those seen in outpatients<sup>12</sup>. An instrument has been developed to assess the  
27  
28 cumulative bowel damage in Crohn's disease but this index is specific for Crohn's disease  
29  
30 and requires imaging reports for completion<sup>13</sup>. In order to be widely utilised and  
31  
32 generalisable, the index should include as few items as possible which are easily obtainable in  
33  
34 any clinical setting and applicable to the majority of patients. An index should also possess  
35  
36 the required psychometric properties such as validity and reliability<sup>14,15</sup>. In IBD, there are  
37  
38 several different disease severity indices available<sup>10, 11</sup>. However, none of them have been  
39  
40 properly validated. Therefore, for a successful IBD registry, there is a need for a short yet  
41  
42 reliable and valid severity score index to assess response to treatment and to detect early  
43  
44 relapse for all types and presentations of IBD.  
45  
46  
47  
48

49  
50 **Aim:**

51  
52 The aim of the study is to develop valid and reliable HRQoL and disease severity  
53  
54 measurement tools that are suitable for use with patients at any stage of their IBD. These tools  
55  
56  
57  
58  
59  
60

1  
2  
3 will be easily recorded at the point of care to support their use for a registry of patients with  
4  
5 IBD.  
6

7 **Objectives of the study:**

8  
9  
10 1. To validate a HRQoL questionnaire (Crohn's and Colitis Quality of Life (CCQ)  
11 questionnaire) and derive a short form (Short CCQ) that is suitable for acute and stable  
12 patients with IBD and covers patients with a stoma or fistula.  
13  
14

15  
16 2. To validate a single clinical severity index (Clinical IBD severity index (CISS)) and  
17 derive a short form that is suitable for all types and presentations of IBD.  
18  
19  
20

21  
22 **Methods and analysis:**

23 **Developing the outcome measures:**

24  
25 **1. The Crohn's and Colitis Health related quality of life questionnaire**

26  
27  
28 The initial version of the Crohn's and Colitis Health related quality of life questionnaire  
29 (CCQ) will be based on the UK Inflammatory Bowel Disease Questionnaire (UK IBDQ) <sup>9</sup>  
30 that was developed and validated in 2000. An extensive literature review will be carried out to  
31 identify supplementary items to reflect the wide range and frequency of symptoms of IBD  
32 when patients are seen as outpatients, inpatients, with perianal disease and with a stoma. The  
33 first draft of CCQ will be as inclusive as possible to cover all patients with IBD. We will  
34 validate the CCQ with a wider group of patients to include patients with both Crohn's disease  
35 (CD) and Ulcerative colitis (UC) as well as patients with a stoma and Crohn's perianal  
36 disease. The questionnaire will be examined by IBD specialists, methodologists and  
37 statisticians to ensure good face and content validity of the items. To ensure that the resulting  
38 questionnaire is clear to patients, we will conduct a feasibility study, asking a small sample of  
39 patients to complete the questionnaires. Quality of life will thus be presented as a simple score  
40 that will be derived from items completed by patients with different IBD phenotypes in a  
41  
42  
43  
44  
45  
46  
47  
48  
49  
50  
51  
52  
53  
54  
55  
56  
57  
58  
59  
60

1  
2  
3 broad spectrum of settings. The score will enable monitoring over time and comparative  
4  
5 assessment across different UK locations.  
6

## 7 8 **2. The Clinical IBD Severity Score (CISS)**

9  
10 The development of Clinical IBD Severity Score (CISS) will follow a clinimetric approach  
11  
12 <sup>14,15</sup>. Items will be selected through reviewing 17 existing clinical severity indices commonly  
13  
14 used in studies for UC and CD (Table 1). To ensure the selected items are applicable to  
15  
16 patients with IBD, a focus group of at least 6 IBD specialists from different UK hospitals ,  
17  
18 statisticians and methodologists will review these items and ensure good face and content  
19  
20 validity. The CISS will assess the acute and chronic severity of IBD. It will have  
21  
22 supplementary questions for perianal disease ( to be used when applicable). The CISS will be  
23  
24 the first clinical severity index to include all presentations of patients with IBD in one single  
25  
26 index.  
27  
28

### 29 30 **Recruitment:**

31  
32 This is a prospective multi-centre study which will be carried out over a 3 year period. Sites  
33  
34 will be invited and patients' will be recruited over a 24 month period Data analysis and  
35  
36 production of the final version of the questionnaires will be carried out in the following 12  
37  
38 months We will recruit patients with Ulcerative colitis (UC) or Crohn's disease (CD).  
39  
40 Invitations will be sent to teaching and general district hospitals across the UK. We will aim  
41  
42 to recruit at least 4 different UK sites. Patients' medical records will be reviewed to confirm  
43  
44 their eligibility as below:  
45  
46

### 47 48 **Inclusion criteria:**

- 49  
50 1. Confirmed diagnosis of UC, Crohn's disease or indeterminate colitis  
51  
52 2. Age 18 years and above  
53  
54 3. Not in a vulnerable group (such as people with mental illness or memory problems,  
55  
56 learning difficulties, or physical disabilities)  
57  
58  
59  
60



4. Able to consent.

**Exclusion criteria:**

1. Patients without a definite diagnosis of UC, Crohn's disease or indeterminate colitis
2. Age less than 18 years
3. Patients within a vulnerable group (such as people with mental illness or memory problems, learning difficulties, or physical disabilities)
4. Unable to consent

If patients meet the inclusion criteria, they will be invited to participate in the study when they attend outpatients or are admitted to hospital. Patients will be asked to give written consent following an oral and written explanation of the study.

The long version of Crohn's and Colitis Quality of life (CCQ) questionnaire will be completed by patients while they are in hospital, in outpatients or at home. Patients will also complete the generic Short Form 12 (SF12)<sup>16</sup> and EuroQoL (EQ5D)<sup>17</sup> questionnaires. They will be asked to complete the same questionnaires within 6 weeks after the initial completion to check test-retest reliability and responsiveness.

The clinical IBD severity score (CISS) will be recorded by the health care professionals when reviewing patients in clinic or on the ward. CISS will be recorded again within 6 weeks after the initial completion in order to check CISS test-retest reliability and responsiveness.

**Sample size:**

When validating a questionnaire it is important that the sample used is representative of the population in which the instrument is to be used. There are no general criteria for the required sample size in a validation study<sup>15</sup>, which is typically based on the assumption that the number of respondents should exceed the number of items in the questionnaire by at least a

1  
2  
3 factor of three<sup>22</sup>. Some authors suggest that rather than the overall sample size it is the ratio of  
4 subjects to items that is important and recommends a 10 to 1 ratio for each item<sup>25</sup>. We anticipate  
5 the CISS will have 17 different items and the CCQ will have 32 different items. We will  
6 therefore aim to recruit a minimum of 170 patients and 320 patients for the validation study of  
7 initial versions of CISS and CCQ respectively.  
8  
9

### 10 11 12 13 14 15 **Psychometric analysis:**

16  
17  
18 Data will be analysed using the Statistical Package for Social Sciences (SPSS) version 19  
19 licensed for Swansea University. The main components of psychometric analysis will be:  
20  
21

#### 22 23 24 **1. Internal consistency**

25  
26  
27 The internal consistency is a measure of reliability. It measures the degree of correlation  
28 between different items in the scale. Internal consistency will be assessed by item-total  
29 correlations and Cronbach  $\alpha$ . Items with item total correlation below 0.2 or more than 0.8 will  
30 be rejected<sup>14,15</sup> as they add little information to the scale. Items will also be considered for  
31 rejection if more than 80% or less than 20% of patients gave the same response because they  
32 won't be able to differentiate different levels of severity. Items that are ambiguous or found  
33 difficult to be answered will be considered for removal or re-wording. Cronbach  $\alpha$  of the  
34 resulting scale should be  $> 0.7$ <sup>15</sup>. Item discrimination power which is the ability of items to  
35 discriminate between patients with different level of severity should be  $> 0.4$ <sup>15</sup> otherwise it  
36 will be considered for rejection. We will carry out stepwise regression of the total scores on  
37 the individual items and will select the items that represent 95% of the variation in the scores  
38 to produce short versions of the CCQ and CISS<sup>15</sup>.  
39  
40  
41  
42  
43  
44  
45  
46  
47  
48  
49  
50  
51  
52  
53  
54  
55  
56  
57  
58  
59  
60

## 2. Validity

Construct validity refers to the correlation of the scale with other instruments that are believed to assess the same attribute with high degrees of validity and reliability<sup>13</sup>. It is commonly measured using Pearson correlation coefficient (*r*). Construct validity will be accepted if Pearson correlation is 0.4 – 0.8<sup>14,15</sup>. Lower correlations mean either one of the tests has low validity or the two tests are measuring different phenomena while high correlations means the two tests are very similar and the new scale is not needed. Construct validity of CCQ will be assessed using Short Form 12 (SF12)<sup>16</sup> and EuroQoL (EQ5D)<sup>17</sup>. Construct validity of CISS will be checked using biochemical markers: C-reactive protein, white cell count, haemoglobin, albumin and clinical indices: Harvey Bradshaw index<sup>18</sup> (for Crohn's disease), Simple clinical colitis activity index<sup>19</sup> (for Ulcerative colitis) and perianal disease activity index<sup>20</sup> (for perianal Crohn's disease). These clinical indices will be selected because they are easy to use and widely cited<sup>10,11</sup> in the literature. When patients undergo endoscopy the following endoscopic indices will be recorded: Mayo clinic score<sup>21</sup>, Rachmilewitz scores<sup>22</sup> in UC and simple endoscopic score<sup>23</sup> in CD.

## 3. Test-retest reliability or reproducibility

Reproducibility is used to assess reliability of the test applied on two occasions. To measure reproducibility, CCQ and CISS will be administered to 20% of patients in two occasions. There should be no overall change in their clinical condition between these two intervals. For CCQ, patients will be asked if their health has changed since they last filled the questionnaires. For CISS, we will use physician global assessment to assess if patients' conditions have changed or not. Patients with no change will be included in the reproducibility analysis using intra-class correlation coefficient. For practical reasons, we will allow a period of 2-6 weeks after the first assessment or since the first questionnaire was

1  
2  
3 completed. Previous studies have illustrated that a period of less than 2 weeks is not reliable  
4  
5 as patients might remember their answers and select them again<sup>14,15</sup>. Therefore we expect to  
6  
7 include patients with quiescent to moderate IBD for the reproducibility analysis because  
8  
9 patients with severe IBD will more likely have their disease changed or have surgery within 2  
10  
11 weeks. A value of intra-class correlation of 0.75<sup>14,15</sup> will be accepted.  
12  
13

#### 14 15 **4. Responsiveness:**

16  
17 Responsiveness is the ability to detect change. This will be computed by applying CCQ and  
18  
19 CISS to 20% of patients in two occasions. For CCQ, patients will be asked if their health  
20  
21 has changed since they last filled the questionnaires. For CISS, we will use physician global  
22  
23 assessment to assess if patients' conditions have changed or not. Patients whose clinical  
24  
25 conditions have changed will be included in the responsiveness analysis using the  
26  
27 responsiveness ratio. Responsiveness ratio will be calculated by dividing the mean change in  
28  
29 scores for patients who reported a change with the standard deviation of the scores of those  
30  
31 who remained stable<sup>15</sup>. A ratio more than 0.5 will be accepted<sup>14,15</sup>. For practical reasons,  
32  
33 we will allow a maximum of 6 weeks after the first assessment or since the first questionnaire  
34  
35 was completed.  
36  
37  
38  
39  
40

#### 41 42 **5. Inter-Observer Reliability:**

43  
44 This is a measure of reliability to assess the degree of consistency between different  
45  
46 observers. We will check the inter-observer reliability of CISS on 20% of patients using  
47  
48 inter-class correlation. Two observers will use CISS to assess the same group of patients. We  
49  
50 will divide the patients into 2 groups. First group will be assessed by a physician and a  
51  
52 specialist nurse while the second group will be assessed by two physicians. A correlation of >  
53  
54 0.75 will be acceptable<sup>15</sup>.  
55  
56  
57  
58  
59  
60

**Ethics and dissemination:**

This study has been approved by the South East Wales Research Ethics Committee (Reference 11/WA/0239). NHS code of confidentiality and Data protection will be adhered to. Once patients are identified, all personal details will be anonymised. Only study related staff will have access to the data. Access will be permitted to appropriately qualified personnel and in accordance with the data protection Act 1998. All data acquisition, storage and transmission will comply with Data Protection Act.

We are committed to publishing our results as widely as possible in peer reviewed journals and to ensuring that appropriate recognition is given to everyone who works on the study.

**Authors' contributions:** LA is the chief investigator of the study. He contributed in writing the protocol, designing the questionnaires, data analysis and analysis. JGW and HH contributed to designing the questionnaires, all drafts of the protocol and data analysis.

**Funding statement:** This work was supported by the Welsh Clinical Academic training (WCAT) scheme and is collaboration between Swansea University and Wales deanery.

**Competing interests:** None.

**Appendices:****Table 1: The commonly used clinical severity indices in literature****Ulcerative Colitis:**

1. Truelove and Witts severity index <sup>26</sup>
2. Powell Tuck index <sup>27</sup>
3. Simple clinical colitis severity index <sup>19</sup>
4. Lichtiger score <sup>28</sup>
5. Clinical Activity Index (CAI) <sup>22</sup>
6. Physician global assessment <sup>29</sup>
7. Improvement based on individual symptom score <sup>30</sup>
8. Ulcerative colitis clinical severity score <sup>31</sup>
9. Seo Score <sup>32</sup>
10. Mayo Clinic activity score <sup>21</sup>

**Crohn's disease:**

1. Crohn's disease activity index <sup>33</sup>
2. Harvey Bradshaw index <sup>18</sup>
3. Van Hees index <sup>34</sup>
4. The Cape Town Index <sup>35</sup>
5. Fistula Drainage assessment <sup>36</sup>
6. Perianal Disease Activity Index (PDAI) <sup>37</sup>
7. Perianal Crohn's disease Activity Index (PCDAI) <sup>20</sup>

## References

1. National Association for Colitis and Crohn's Disease. Inflammatory bowel disease basics. <http://www.nacc.org.uk/content/ibd.asp> (accessed 20th October 2010)
2. IBD Standards Group. Quality care. Service standards for the healthcare of people who have Inflammatory Bowel Disease (IBD). 2009. [Accessed on 12 May, 2009]; Available from [www.ibdstandards.org.uk/](http://www.ibdstandards.org.uk/).
3. Rutgeerts P, Sandborn WJ, Feagan BG, Reinisch W, Olson A, Johanns J, Travers S, Rachmilewitz D, Hanauer SB, Lichtenstein GR, de Villiers WJ, Present D, Sands BE, Colombel JF. Infliximab for Induction and Maintenance Therapy for Ulcerative Colitis. *N Engl J Med* 2005; 353:2462-2476
4. Hanauer SB, Feagan BG, Lichtenstein GR, Mayer LF, Schreiber S, Colombel JF, Rachmilewitz D, Wolf DC, Olson A, Bao W, Rutgeerts P; ACCENT I Study Group. Maintenance infliximab for Crohn's disease: the ACCENT I randomised trial. *Lancet*. 2002 May 4; 359(9317):1541-9.
5. Ferkolj I. How to improve the safety of biologic therapy in Crohn's disease. 2009. *J Physiol Pharmacol. Suppl* 7:67-70.
6. National Institute for Health and Clinical Excellence. Crohn's disease - Infliximab (review) and Adalimumab, TA187 (review of TA40). London. 2010
7. Irvine EJ. Health related quality of life of patients with ulcerative colitis: past, present, and future. *Inflamm Bowel Dis*. 2008 Apr;14(4):554-65.
8. Mitchell A, Guyatt G, Singer J, Irvine EJ, Goodacre R, Tompkins C, Williams N, Wagner F. Health related quality of life in patients with inflammatory bowel disease. *J Clin Gastroenterol*. 1988 Jun;10(3):306-10.

- 1  
2  
3 9. Cheung WY, Garratt AM, Russell IT, Williams JG. The UK IBDQ-a British version  
4 of the inflammatory bowel disease questionnaire. Development and validation. *J Clin*  
5  
6 Epidemiol. 2000 Mar 1;53(3):297-306.  
7  
8
- 9  
10 10. D'Haens G, Sandborn WJ, Feagan BG, Geboes K, Hanauer SB, Irvine EJ, Lémann M,  
11 Marteau P, Rutgeerts P, Schölmerich J, Sutherland LR. A review of severity indices  
12 and efficacy end points for clinical trials of medical therapy in adults with ulcerative  
13 colitis. *Gastroenterology*. 2007 Feb;132(2):763-86.  
14  
15
- 16  
17 11. Sandborn WJ, Feagan BG, Hanauer SB, Lochs H, Löfberg R, Modigliani R, Present  
18 DH, Rutgeerts P, Schölmerich J, Stange EF, Sutherland LR. A review of severity  
19 indices and efficacy endpoints for clinical trials of medical therapy in adults with  
20 Crohn's disease. *Gastroenterology*. 2002 Feb;122(2):512-30  
21  
22
- 23  
24 12. Allen PB, Kamm MA, Peyrin-Biroulet L, Studd C, McDowell C, Allen BC, Connell  
25 WR, De Cruz PP, Bell SJ, Elliot RP, Brown S, Desmond PV, Lemann M, Colombel  
26 JF. Development and validation of a patient-reported disability measurement tool for  
27 patients with inflammatory bowel disease *Aliment Pharmacol Ther*. 2013  
28 Feb;37(4):438-44  
29  
30
- 31  
32 13. Pariente B, Cosnes J, Danese S, Sandborn WJ, Lewin M, Fletcher JG, Chowers Y,  
33 D'Haens G, Feagan BG, Hibi T, Hommes DW, Irvine EJ, Kamm MA, Loftus EV Jr,  
34 Louis E, Michetti P, Munkholm P, Oresland T, Panés J, Peyrin-Biroulet L, Reinisch  
35 W, Sands BE, Schoelmerich J, Schreiber S, Tilg H, Travis S, van Assche G, Vecchi  
36 M, Mary JY, Colombel JF, Lémann M. Development of the Crohn's disease digestive  
37 damage score, the Lémann score. *Inflamm Bowel Dis*. 2011 Jun;17(6):1415-22  
38  
39
- 40  
41 14. Marx RG, C Bombardier C, Hogg-Johnson S, Wright JG. Clinimetric and  
42 psychometric strategies for development of a health measurement scale. *J Clin*  
43  
44 Epidemiol, 1999. 52(2): p. 105-11  
45  
46  
47  
48  
49  
50  
51  
52  
53  
54  
55  
56  
57  
58  
59  
60



- 1  
2  
3 15. Streiner DL, Norman GR. Health measurement scales. A practical guided to their  
4 development uses. 4<sup>th</sup> ed, 2008 OUP.
- 5  
6  
7 16. Ware J Jr, Kosinski M, Keller SD. A 12-Item Short-Form Health Survey: construction  
8 of scales and preliminary tests of reliability and validity. *Med Care* 1996; 34:220-33.
- 9  
10  
11 17. EuroQoL Group. EuroQoL: a new facility for the measurement of heath-related  
12 quality of life. *Health Policy* 1990. 16:199–208
- 13  
14  
15 18. Harvey RF, Bradshaw JM. A simple index of Crohn's disease activity. *Lancet*  
16 1980;1:514.
- 17  
18  
19 19. Walmsley RS, Ayres RC, Pounder RE, Allan RN. A simple clinical colitis activity  
20 index. *Gut*. 1998 Jul;43(1):29-32.
- 21  
22  
23 20. Irvine EJ. Usual therapy improves perianal Crohn's disease as measured by a  
24 new disease activity index. McMaster IBD Study Group. *J Clin Gastroenterol*  
25 1995;20:27-32.
- 26  
27  
28 21. Schroeder KW, Tremaine WJ, Ilstrup DM. Coated oral 5-aminosalicylic acid therapy  
29 for mildly to moderately active ulcerative colitis. A randomized study. *N Engl J Med*.  
30 1987 Dec 24;317(26):1625-9.
- 31  
32  
33 22. Rachmilewitz D. Coated mesalazine (5-aminosalicylic acid) versus sulphasalazine in  
34 the treatment of active ulcerative colitis: a randomised trial. *BMJ*. 1989 Jan  
35 14;298(6666):82-6.
- 36  
37  
38 23. Daperno M, D'Haens G, Van Assche G, Baert F, Bulois P, Maunoury V, Sostegni R,  
39 Rocca R, Pera A, Gevers A, Mary JY, Colombel JF, Rutgeerts P. Development and  
40 validation of a new, simplified endoscopic activity score for Crohn's disease: the SES-  
41 CD. *Gastrointest Endosc*. 2004 Oct;60(4):505-12.
- 42  
43  
44 24. Barrett P, Kline P. The observation to variable ratio in factor analysis. *J Personality*  
45  
46  
47  
48  
49  
50  
51  
52  
53  
54  
55  
56  
57  
58  
59  
60 Group Behaviour 1981;1:23-33.

- 1  
2  
3 25. Nunnally, J C . Psychometric theory 1978.New York : McGraw-Hill
- 4  
5 26. Truelove SC, Witts LJ. Cortisone in ulcerative colitis; final report on a therapeutic  
6  
7 trial. *Br Med J*. 1955 Oct 29;2(4947):1041-8.
- 8  
9 27. Powell-Tuck J, Day DW, Buckell NA, Wadsworth J, Lennard-Jones JE. Correlations  
10  
11 between defined sigmoidoscopic appearances and other measures of disease activity in  
12  
13 ulcerative colitis. *Dig Dis Sci*. 1982 ;27(6):533-7.
- 14  
15 28. Lichtiger S, Present DH. Preliminary report: cyclosporin in treatment of severe active  
16  
17 ulcerative colitis. *Lancet*. 1990 Jul 7;336(8706):16-9.
- 18  
19 29. Hanauer S, Schwartz J, Robinson M, Roufail W, Arora S, Cello J, Safdi M.  
20  
21 Mesalamine capsules for treatment of active ulcerative colitis: results of a controlled  
22  
23 trial. Pentasa Study Group. *Am J Gastroenterol*. 1993 Aug;88(8):1188-97
- 24  
25 30. Levine DS, Riff DS, Pruitt R, Wruble L, Koval G, Sales D, Bell JK, Johnson LK. A  
26  
27 randomized, double blind, dose-response comparison of balsalazide (6.75 g),  
28  
29 balsalazide (2.25 g), and mesalamine (2.4 g) in the treatment of active, mild-to-  
30  
31 moderate ulcerative colitis. *Am J Gastroenterol*. 2002 Jun;97(6):1398-407.
- 32  
33 31. Feagan BG, Greenberg GR, Wild G, Fedorak RN, Paré P, McDonald JW, Dubé R,  
34  
35 Cohen A, Steinhart AH, Landau S, Aguzzi RA, Fox IH, Vandervoort MK. Treatment  
36  
37 of ulcerative colitis with a humanized antibody to the alpha4beta7 integrin. *N Engl J*  
38  
39 *Med*. 2005 Jun 16;352(24):2499-507.
- 40  
41 32. Seo M, Okada M, Yao T, Ueki M, Arima S, Okumura M. An index of disease activity  
42  
43 in patients with ulcerative colitis. *Am J Gastroenterol*. 1992 Aug;87(8):971-6.
- 44  
45 33. Best WR, Beckett JM, Singleton JW, Kern F Jr. Development of a Crohn's disease  
46  
47 activity index. National Cooperative Crohn's Disease Study. *Gastroenterology* 19  
48  
49 76 ; 70 : 439 - 444 .
- 50  
51  
52  
53  
54  
55  
56  
57  
58  
59  
60

- 1  
2  
3 34. van Hees PA, van Elteren PH, van Lier H J, van Tongeren JH. An index of  
4  
5 inflammatory activity in patients with Crohn's disease. Gut 1980;21:279-286.  
6  
7 35. Wright JP, Marks IN, Parfitt A. A simple clinical index of Crohn's disease activity-  
8  
9 -the Cape Town index. S Afr Med J 1985;68: 502-503.  
10  
11 36. Present DH, Rutgeerts P, Targan S, Hanauer SB, Mayer L, van Hogezaand RA,  
12  
13 Podolsky DK, Sands BE, Braakman T, DeWoody KL, Schaible TF, van Deventer  
14  
15 SJ. Infliximab for the treatment of fistulas in patients with Crohn's disease. N  
16  
17 Engl J Med 1999;340:1398 -1405.  
18  
19 37. Pikarsky AJ, Gervaz P, Wexner SD. Perianal Crohn disease: a new scoring system to  
20  
21 evaluate and predict outcome of surgical intervention. Arch Surg. 2002  
22  
23 Jul;137(7):774-7  
24  
25  
26  
27  
28  
29  
30  
31  
32  
33  
34  
35  
36  
37  
38  
39  
40  
41  
42  
43  
44  
45  
46  
47  
48  
49  
50  
51  
52  
53  
54  
55  
56  
57  
58  
59  
60

1  
2  
3  
4  
5 **Protocol for a prospective multicentre cohort study to develop and validate two new**  
6 **outcome measures for patients with inflammatory bowel disease.**  
7  
8  
9

10  
11  
12  
13  
14 L Alrubaiy\* , HA Hutchings, JG Williams  
15  
16  
17  
18  
19

20  
21 Centre for Health Information, Research and Evaluation (CHIRAL), Swansea University,  
22  
23 Singleton Park, Swansea SA2 8PP  
24  
25  
26  
27  
28

29  
30 Corresponding author:  
31

32 Dr. Laith Alrubaiy  
33

34 Room 220, Grove building  
35

36 College of Medicine  
37

38 Swansea University  
39

40 Swansea SA2 8PP  
41

42  
43 Email: l.alrubaiy@swansea.ac.uk  
44

45  
46 Tel: 0044 7809670683  
47  
48

49  
50 Keywords: Outcome measures, inflammatory bowel disease, health related quality of life ,  
51  
52 disease severity index  
53  
54  
55

56 Words count: Abstract 294. Main article 2575  
57  
58  
59  
60

1  
2  
3 The Corresponding Author has the right to grant on behalf of all authors and does grant on  
4  
5 behalf of all authors, an exclusive licence (or non-exclusive for government employees) on a  
6  
7 worldwide basis to the BMJ Publishing Group Ltd and its Licensees to permit this article (if  
8  
9 accepted) to be published in BMJ Open and any other BMJ PGL products to exploit all  
10  
11 subsidiary rights, as set out in our licence  
12  
13 (<http://group.bmj.com/products/journals/instructions-for-authors/licence-forms>) and the  
14  
15 Corresponding Author accepts and understands that any supply made under these terms is  
16  
17 made by BMJ PGL to the Corresponding Author. All articles published in BMJ Open will be  
18  
19 made available on an Open Access basis (with authors being asked to pay an open access fee -  
20  
21 see <http://bmjopen.bmj.com/site/about/resources.xhtml> Access shall be governed by a  
22  
23 Creative Commons licence – details as to which Creative Commons licence will apply to the  
24  
25 article are set out in our licence referred to above.  
26  
27  
28  
29  
30  
31  
32  
33  
34  
35  
36  
37  
38  
39  
40  
41  
42  
43  
44  
45  
46  
47  
48  
49  
50  
51  
52  
53  
54  
55  
56  
57  
58  
59  
60

**Abstract:**

**Introduction:** Most of the health related quality of life (HRQoL) measures for patients with inflammatory bowel disease (IBD) were designed to be used in outpatient settings and are, therefore, not suitable for use in acute inpatient settings. None of the currently used clinical severity indices for patients with IBD have been properly validated. The aim of this study is to describe the development of a new health related quality of life questionnaire and a clinical severity index for patients with ulcerative colitis or Crohn's disease that are short, valid and suitable at any stage of their disease. These new outcome measurement tools will be easily used at the point of care, and invaluable monitoring tools for clinical care, audit and research.

**Methods and analysis:** This is a prospective multi-site validation study of two new outcome measures, the Crohn's and Colitis quality of life (CCQ) questionnaire and the Clinical IBD severity score (CISS). We plan to recruit patients with ulcerative colitis or Crohn's disease. Questionnaire items will be selected through extensive literature review and a focus group involving patients, methodologists, statisticians and IBD specialists. The CCQ questionnaire will be completed by patients attending IBD clinics, having endoscopy procedures or when admitted to hospital. The CISS will be completed by clinicians while assessing patients with IBD. Psychometric analysis will be carried out to test the validity and the reliability of the questionnaires and determine the potential to produce shorter versions of CISS and CCQ. The construct validity of the CCQ will be tested against short form-12 (SF12) and the European Quality of Life Five Dimensions (EQ5D). The construct validity of CISS will be tested against biochemical markers, clinical and endoscopic indices to assess severity.

**Ethics:** This study was approved by the South East Wales Research Ethics Committee (Ref 11/WA/0239).

**Article summary:**

## Article focus:

- None of the currently used clinical severity indices for patients with inflammatory bowel disease (IBD) have been properly validated.
- Most of the health related quality of life (HRQoL) measures for patients with IBD have been designed for use in outpatient settings and are, therefore, not suitable for use in acute inpatient settings
- This article describes the protocol for a prospective multi-site validation study of two new outcome measures; the Crohn's and Colitis Health related quality of life (CCQ) questionnaire and the Clinical IBD severity score (CISS).

## Key measures:

- The main focus of the article is the development and validation of two outcome measures to assess the quality of life and disease severity of patients with IBD.
- This article provides an insight into the methods used to develop and validate new outcome measures which can applied to any disease.

## Strength and limitations of this study:

- The CISS will be the first fully validated clinical severity index for patients with IBD.
- The CCQ will be the first health related quality of life tool that will be applicable to all types and presentations of IBD.
- It may be difficult to recruit adequate numbers of patients with less common presentations of IBD like perianal Crohn's disease or patients with extra-intestinal manifestations.

**Introduction:**

Inflammatory bowel disease (IBD) affects approximately one person in every 250 in the United Kingdom population<sup>1</sup>. The cost of IBD to the NHS has been estimated at about £720 million per annum, based on the prevalence and an average cost of £3,000 per year per patient<sup>2</sup>. The lifetime medical costs associated with the care of IBD are comparable with major chronic diseases such as diabetes mellitus or cancer<sup>2</sup>. Anti Tumour Necrosis factor  $\alpha$  (Anti TNF- $\alpha$ ) drugs are new and effective biological treatments for both ulcerative colitis<sup>3</sup> and Crohn's disease<sup>4</sup> but long-term outcomes are still unknown and there are a number of safety issues<sup>5</sup>. Therefore, the National Institute for Health and Clinical Excellence (NICE) has recommended the establishment of a Registry for patients with IBD treated with biological therapy<sup>6</sup>. Assessment of response to treatment will require measurement of both HRQoL and disease severity.

HRQoL questionnaires are often employed as measures of health status and are important outcome measures in clinical trials. They should form an integral part of any outcome monitoring efforts but are often omitted from large scale registries because of constraints on the amount of data these registries can collect. To facilitate adoption of HRQoL measures in large IBD registries, it is important to develop instruments which are short and easy to complete, yet valid, reliable and applicable to all IBD patients.

IBD has a great impact on the quality of life as it is not curable and follows an unpredictable relapsing and remitting course with significant variation in the pattern and complexity of symptoms that may affect each patient, sometimes leading to hospital admission, surgery and bowel resection, which may leave the patient with a stoma. There are several specific HRQoL measurement tools for patients with inflammatory bowel disease<sup>7, 8, and 9</sup>. However, all of them have been designed for use in the outpatient setting with stable patients and there is no



1  
2  
3 HRQoL instrument that is validated for use both in the community and by patients who are  
4  
5 acutely ill, have a stoma or perianal disease.  
6

7  
8 In clinical practice, assessing disease severity is an important part of IBD management and a  
9  
10 standardized and quantitative evaluation of the severity of IBD is needed for the registry. Due  
11  
12 to the varied presentations of IBD, a number of clinical indices have been put forward using  
13  
14 different parameters which are based on different principles<sup>10, 11</sup>. **Currently available disease**  
15  
16 **severity indices measure disease severity at a single point of time rather than over a longer**  
17  
18 **time period which is an important outcome to assess quality of care. Therefore, a new index**  
19  
20 **that assesses the chronic severity of IBD over a long period of time is needed. A recently**  
21  
22 **reported disability measurement tool for patients with IBD has good correlation with other**  
23  
24 **quality of life and disease severity tools, but has not been validated on acutely unwell**  
25  
26 **patients, only those seen in outpatients<sup>12</sup>. An instrument has been developed to assess the**  
27  
28 **cumulative bowel damage in Crohn's disease but this index is specific for Crohn's disease**  
29  
30 **and requires imaging reports for completion<sup>13</sup>. In order to be widely utilised and**  
31  
32 **generalisable, the index should include as few items as possible which are easily obtainable in**  
33  
34 **any clinical setting and applicable to the majority of patients. An index should also possess**  
35  
36 **the required psychometric properties such as validity and reliability<sup>14,15</sup>. In IBD, there are**  
37  
38 **several different disease severity indices available<sup>10, 11</sup>. However, none of them have been**  
39  
40 **properly validated. Therefore, for a successful IBD registry, there is a need for a short yet**  
41  
42 **reliable and valid severity score index to assess response to treatment and to detect early**  
43  
44 **relapse for all types and presentations of IBD.**  
45  
46  
47  
48

49  
50 **Aim:**

51  
52 The aim of the study is to develop valid and reliable HRQoL and disease severity  
53  
54 measurement tools that are suitable for use with patients at any stage of their IBD. These tools  
55  
56  
57  
58  
59  
60

1  
2  
3 will be easily recorded at the point of care to support their use for a registry of patients with  
4  
5 IBD.  
6

### 7 **Objectives of the study:**

8  
9  
10 **1.** To validate a HRQoL questionnaire (Crohn's and Colitis Quality of Life (CCQ)  
11 questionnaire) and derive a short form (Short CCQ) that is suitable for acute and stable  
12 patients with IBD and covers patients with a stoma or fistula.  
13  
14

15  
16 **2.** To validate a single clinical severity index (Clinical IBD severity index (CISS)) and  
17 derive a short form that is suitable for all types and presentations of IBD.  
18  
19  
20

### 21 **Methods and analysis:**

#### 22 **Developing the outcome measures:**

##### 23 **1. The Crohn's and Colitis Health related quality of life questionnaire**

24  
25 The initial version of the Crohn's and Colitis Health related quality of life questionnaire  
26 (CCQ) will be based on the UK Inflammatory Bowel Disease Questionnaire (UK IBDQ) <sup>9</sup>  
27 that was developed and validated in 2000. An extensive literature review will be carried out to  
28 identify supplementary items to reflect the wide range and frequency of symptoms of IBD  
29 when patients are seen as outpatients, inpatients, with perianal disease and with a stoma. The  
30 first draft of CCQ will be as inclusive as possible to cover all patients with IBD. We will  
31 validate the CCQ with a wider group of patients to include patients with both Crohn's disease  
32 (CD) and Ulcerative colitis (UC) as well as patients with a stoma and Crohn's perianal  
33 disease. The questionnaire will be examined by IBD specialists, methodologists and  
34 statisticians to ensure good face and content validity of the items. To ensure that the resulting  
35 questionnaire is clear to patients, we will conduct a feasibility study, asking a small sample of  
36 patients to complete the questionnaires. **Quality of life will thus be presented as a simple score  
37 that will be derived from items completed by patients with different IBD phenotypes in a**  
38  
39  
40  
41  
42  
43  
44  
45  
46  
47  
48  
49  
50  
51  
52  
53  
54  
55  
56  
57  
58  
59  
60

1  
2  
3 broad spectrum of settings. The score will enable monitoring over time and comparative  
4  
5 assessment across different UK locations.  
6

## 7 **2. The Clinical IBD Severity Score (CISS)**

8  
9 The development of Clinical IBD Severity Score (CISS) will follow a clinimetric approach  
10  
11 <sup>14,15</sup>. Items will be selected through reviewing 17 existing clinical severity indices commonly  
12  
13 used in studies for UC and CD (Table 1). To ensure the selected items are applicable to  
14  
15 patients with IBD, a focus group of at least 6 IBD specialists from different UK hospitals,  
16  
17 statisticians and methodologists will review these items and ensure good face and content  
18  
19 validity. The CISS will assess the acute and chronic severity of IBD. It will have  
20  
21 supplementary questions for perianal disease (to be used when applicable). The CISS will be  
22  
23 the first clinical severity index to include all presentations of patients with IBD in one single  
24  
25 index.  
26  
27  
28

### 29 **Recruitment:**

30  
31 This is a prospective multi-centre study which will be carried out over a 3 year period. Sites  
32  
33 will be invited and patients' will be recruited over a 24 month period. Data analysis and  
34  
35 production of the final version of the questionnaires will be carried out in the following 12  
36  
37 months. We will recruit patients with Ulcerative colitis (UC) or Crohn's disease (CD).  
38  
39 Invitations will be sent to teaching and general district hospitals across the UK. We will aim  
40  
41 to recruit at least 4 different UK sites. Patients' medical records will be reviewed to confirm  
42  
43 their eligibility as below:  
44  
45  
46

### 47 **Inclusion criteria:**

- 48  
49 1. Confirmed diagnosis of UC, Crohn's disease or indeterminate colitis  
50  
51 2. Age 18 years and above  
52  
53 3. Not in a vulnerable group (such as people with mental illness or memory problems,  
54  
55 learning difficulties, or physical disabilities)  
56  
57  
58  
59  
60

4. Able to consent.

**Exclusion criteria:**

1. Patients without a definite diagnosis of UC, Crohn's disease or indeterminate colitis
2. Age less than 18 years
3. Patients within a vulnerable group (such as people with mental illness or memory problems, learning difficulties, or physical disabilities)
4. Unable to consent

If patients meet the inclusion criteria, they will be invited to participate in the study when they attend outpatients or are admitted to hospital. Patients will be asked to give written consent following an oral and written explanation of the study.

The long version of Crohn's and Colitis Quality of life (CCQ) questionnaire will be completed by patients while they are in hospital, in outpatients or at home. Patients will also complete the generic Short Form 12 (SF12)<sup>16</sup> and EuroQoL (EQ5D)<sup>17</sup> questionnaires. They will be asked to complete the same questionnaires within 6 weeks after the initial completion to check test-retest reliability and responsiveness.

The clinical IBD severity score (CISS) will be recorded by the health care professionals when reviewing patients in clinic or on the ward. CISS will be recorded again in 2-6 weeks after the initial completion in order to check CISS test-retest reliability and responsiveness.

**Sample size:**

When validating a questionnaire it is important that the sample used is representative of the population in which the instrument is to be used. There are no general criteria for the required sample size in a validation study<sup>15</sup>, which is typically based on the assumption that the number of respondents should exceed the number of items in the questionnaire by at least a

1  
2  
3 factor of three<sup>22</sup>. Some authors suggest that rather than the overall sample size it is the ratio of  
4  
5 subjects to items that is important and recommends a 10 to 1 ratio for each item<sup>25</sup>. We anticipate  
6  
7 the CISS will have 17 different items and the CCQ will have 32 different items. We will  
8  
9 therefore aim to recruit a minimum of 170 patients and 320 patients for the validation study of  
10  
11 initial versions of CISS and CCQ respectively.  
12  
13

### 14 **Psychometric analysis:**

15  
16  
17  
18 Data will be analysed using the Statistical Package for Social Sciences (SPSS) version 19  
19  
20 licensed for Swansea University. The main components of psychometric analysis will be:  
21  
22

#### 23 **1. Internal consistency**

24  
25  
26  
27 The internal consistency is a measure of reliability. It measures the degree of correlation  
28  
29 between different items in the scale. Internal consistency will be assessed by item-total  
30  
31 correlations and Cronbach  $\alpha$ . Items with item total correlation below 0.2 or more than 0.8 will  
32  
33 be rejected<sup>14,15</sup> as they add little information to the scale. Items will also be considered for  
34  
35 rejection if more than 80% or less than 20% of patients gave the same response because they  
36  
37 won't be able to differentiate different levels of severity. Items that are ambiguous or found  
38  
39 difficult to be answered will be considered for removal or re-wording. Cronbach  $\alpha$  of the  
40  
41 resulting scale should be  $> 0.7$ <sup>15</sup>. Item discrimination power which is the ability of items to  
42  
43 discriminate between patients with different level of severity should be  $>0.4$ <sup>15</sup> otherwise it  
44  
45 will be considered for rejection. We will carry out stepwise regression of the total scores on  
46  
47 the individual items and will select the items that represent 95% of the variation in the scores  
48  
49 to produce short versions of the CCQ and CISS<sup>15</sup>.  
50  
51  
52  
53  
54  
55  
56  
57  
58  
59  
60

## 2. Validity

Construct validity refers to the correlation of the scale with other instruments that are believed to assess the same attribute with high degrees of validity and reliability<sup>13</sup>. It is commonly measured using Pearson correlation coefficient ( $r$ ). Construct validity will be accepted if Pearson correlation is 0.4 – 0.8<sup>14,15</sup>. Lower correlations mean either one of the tests has low validity or the two tests are measuring different phenomena while high correlations means the two tests are very similar and the new scale is not needed. Construct validity of CCQ will be assessed using Short Form 12 (SF12)<sup>16</sup> and EuroQoL (EQ5D)<sup>17</sup>. Construct validity of CISS will be checked using biochemical markers: C-reactive protein, white cell count, haemoglobin, albumin and clinical indices: Harvey Bradshaw index<sup>18</sup> (for Crohn's disease), Simple clinical colitis activity index<sup>19</sup> (for Ulcerative colitis) and perianal disease activity index<sup>20</sup> (for perianal Crohn's disease). **These clinical indices will be selected because they are easy to use and widely cited<sup>10,11</sup> in the literature.** When patients undergo endoscopy the following endoscopic indices will be recorded: Mayo clinic score<sup>21</sup>, Rachmilewitz scores<sup>22</sup> in UC and simple endoscopic score<sup>23</sup> in CD.

## 3. Test-retest reliability or reproducibility

Reproducibility is used to assess reliability of the test applied on two occasions. To measure reproducibility, CCQ and CISS will be administered to 20% of patients in two occasions. There should be no overall change in their clinical condition between these two intervals. For CCQ, patients will be asked if their health has changed since they last filled the questionnaires. For CISS, we will use physician global assessment to assess if patients' conditions have changed or not. Patients with no change will be included in the reproducibility analysis using intra-class correlation coefficient. **For practical reasons, we will allow a period of 2-6 weeks after the first assessment or since the first questionnaire was**

1  
2  
3 completed. Previous studies have illustrated that a period of less than 2 weeks is not reliable  
4 as patients might remember their answers and select them again<sup>14,15</sup>. Therefore we expect to  
5 include patients with quiescent to moderate IBD for the reproducibility analysis because  
6 patients with severe IBD will more likely have their disease changed or have surgery within 2  
7 weeks. A value of intra-class correlation of 0.75<sup>14,15</sup> will be accepted.  
8  
9  
10  
11  
12  
13

#### 14 **4. Responsiveness:**

15  
16 Responsiveness is the ability to detect change. This will be computed by applying CCQ and  
17 CISS to 20% of patients in two occasions. For CCQ, patients will be asked if their health  
18 has changed since they last filled the questionnaires. For CISS, we will use physician global  
19 assessment to assess if patients' conditions have changed or not. Patients whose clinical  
20 conditions have changed will be included in the responsiveness analysis using the  
21 responsiveness ratio. Responsiveness ratio will be calculated by dividing the mean change in  
22 scores for patients who reported a change with the standard deviation of the scores of those  
23 who remained stable<sup>15</sup>. A ratio more than 0.5 will be accepted<sup>14,15</sup>. For practical reasons,  
24 we will allow a maximum of 6 weeks after the first assessment or since the first questionnaire  
25 was completed.  
26  
27  
28  
29  
30  
31  
32  
33  
34  
35  
36  
37  
38  
39  
40  
41

#### 42 **5. Inter-Observer Reliability:**

43  
44 This is a measure of reliability to assess the degree of consistency between different  
45 observers. We will check the inter-observer reliability of CISS on 20% of patients using  
46 inter-class correlation. Two observers will use CISS to assess the same group of patients. We  
47 will divide the patients into 2 groups. First group will be assessed by a physician and a  
48 specialist nurse while the second group will be assessed by two physicians. A correlation of >  
49 0.75 will be acceptable<sup>15</sup>.  
50  
51  
52  
53  
54  
55  
56  
57  
58  
59  
60

**Ethics and dissemination:**

This study has been approved by the South East Wales Research Ethics Committee (Reference 11/WA/0239). NHS code of confidentiality and Data protection will be adhered to. Once patients are identified, all personal details will be anonymised. Only study related staff will have access to the data. Access will be permitted to appropriately qualified personnel and in accordance with the data protection Act 1998. All data acquisition, storage and transmission will comply with Data Protection Act.

We are committed to publishing our results as widely as possible in peer reviewed journals and to ensuring that appropriate recognition is given to everyone who works on the study.

**Authors' contributions:** LA is the chief investigator of the study. He contributed in writing the protocol, designing the questionnaires, data analysis and analysis. JGW and HH contributed to designing the questionnaires, all drafts of the protocol and data analysis.

**Funding statement:** This work was supported by the Welsh Clinical Academic training (WCAT) scheme and is collaboration between Swansea University and Wales deanery.

**Competing interests:** None.



**Appendices:****Table 1: The commonly used clinical severity indices in literature****Ulcerative Colitis:**

1. Truelove and Witts severity index <sup>26</sup>
2. Powell Tuck index <sup>27</sup>
3. Simple clinical colitis severity index <sup>19</sup>
4. Lichtiger score <sup>28</sup>
5. Clinical Activity Index (CAI) <sup>22</sup>
6. Physician global assessment <sup>29</sup>
7. Improvement based on individual symptom score <sup>30</sup>
8. Ulcerative colitis clinical severity score <sup>31</sup>
9. Seo Score <sup>32</sup>
10. Mayo Clinic activity score <sup>21</sup>

**Crohn's disease:**

1. Crohn's disease activity index <sup>33</sup>
2. Harvey Bradshaw index <sup>18</sup>
3. Van Hees index <sup>34</sup>
4. The Cape Town Index <sup>35</sup>
5. Fistula Drainage assessment <sup>36</sup>
6. Perianal Disease Activity Index (PDAI) <sup>37</sup>
7. Perianal Crohn's disease Activity Index (PCDAI) <sup>20</sup>

## References

1. National Association for Colitis and Crohn's Disease. Inflammatory bowel disease basics. <http://www.nacc.org.uk/content/ibd.asp> (accessed 20th October 2010)
2. IBD Standards Group. Quality care. Service standards for the healthcare of people who have Inflammatory Bowel Disease (IBD). 2009. [Accessed on 12 May, 2009]; Available from [www.ibdstandards.org.uk/](http://www.ibdstandards.org.uk/).
3. Rutgeerts P, Sandborn WJ, Feagan BG, Reinisch W, Olson A, Johanns J, Travers S, Rachmilewitz D, Hanauer SB, Lichtenstein GR, de Villiers WJ, Present D, Sands BE, Colombel JF. Infliximab for Induction and Maintenance Therapy for Ulcerative Colitis. *N Engl J Med* 2005; 353:2462-2476
4. Hanauer SB, Feagan BG, Lichtenstein GR, Mayer LF, Schreiber S, Colombel JF, Rachmilewitz D, Wolf DC, Olson A, Bao W, Rutgeerts P; ACCENT I Study Group. Maintenance infliximab for Crohn's disease: the ACCENT I randomised trial. *Lancet*. 2002 May 4; 359(9317):1541-9.
5. Ferkolj I. How to improve the safety of biologic therapy in Crohn's disease. 2009. *J Physiol Pharmacol. Suppl* 7:67-70.
6. National Institute for Health and Clinical Excellence. Crohn's disease - Infliximab (review) and Adalimumab, TA187 (review of TA40). London. 2010
7. Irvine EJ. Health related quality of life of patients with ulcerative colitis: past, present, and future. *Inflamm Bowel Dis*. 2008 Apr;14(4):554-65.
8. Mitchell A, Guyatt G, Singer J, Irvine EJ, Goodacre R, Tompkins C, Williams N, Wagner F. Health related quality of life in patients with inflammatory bowel disease. *J Clin Gastroenterol*. 1988 Jun;10(3):306-10.

- 1  
2  
3 9. Cheung WY, Garratt AM, Russell IT, Williams JG. The UK IBDQ-a British version  
4 of the inflammatory bowel disease questionnaire. Development and validation. *J Clin*  
5  
6 Epidemiol. 2000 Mar 1;53(3):297-306.  
7  
8
- 9  
10 10. D'Haens G, Sandborn WJ, Feagan BG, Geboes K, Hanauer SB, Irvine EJ, Lémann M,  
11  
12 Marteau P, Rutgeerts P, Schölmerich J, Sutherland LR. A review of severity indices  
13 and efficacy end points for clinical trials of medical therapy in adults with ulcerative  
14 colitis. *Gastroenterology*. 2007 Feb;132(2):763-86.  
15  
16
- 17  
18 11. Sandborn WJ, Feagan BG, Hanauer SB, Lochs H, Löfberg R, Modigliani R, Present  
19  
20 DH, Rutgeerts P, Schölmerich J, Stange EF, Sutherland LR. A review of severity  
21 indices and efficacy endpoints for clinical trials of medical therapy in adults with  
22 Crohn's disease. *Gastroenterology*. 2002 Feb;122(2):512-30  
23  
24
- 25  
26 12. Allen PB, Kamm MA, Peyrin-Biroulet L, Studd C, McDowell C, Allen BC, Connell  
27  
28 WR, De Cruz PP, Bell SJ, Elliot RP, Brown S, Desmond PV, Lemann M, Colombel  
29  
30 JF. Development and validation of a patient-reported disability measurement tool for  
31  
32 patients with inflammatory bowel disease *Aliment Pharmacol Ther*. 2013  
33  
34 Feb;37(4):438-44  
35  
36
- 37  
38 13. Pariente B, Cosnes J, Danese S, Sandborn WJ, Lewin M, Fletcher JG, Chowers Y,  
39  
40 D'Haens G, Feagan BG, Hibi T, Hommes DW, Irvine EJ, Kamm MA, Loftus EV Jr,  
41  
42 Louis E, Michetti P, Munkholm P, Oresland T, Panés J, Peyrin-Biroulet L, Reinisch  
43  
44 W, Sands BE, Schoelmerich J, Schreiber S, Tilg H, Travis S, van Assche G, Vecchi  
45  
46 M, Mary JY, Colombel JF, Lémann M. Development of the Crohn's disease digestive  
47  
48 damage score, the Lémann score. *Inflamm Bowel Dis*. 2011 Jun;17(6):1415-22  
49  
50
- 51  
52 14. Marx RG, C Bombardier C, Hogg-Johnson S, Wright JG. Clinimetric and  
53  
54 psychometric strategies for development of a health measurement scale. *J Clin*  
55  
56 Epidemiol, 1999. 52(2): p. 105-11  
57  
58  
59  
60

15. Streiner DL, Norman GR. Health measurement scales. A practical guided to their development uses. 4<sup>th</sup> ed, 2008 OUP.
16. Ware J Jr, Kosinski M, Keller SD. A 12-Item Short-Form Health Survey: construction of scales and preliminary tests of reliability and validity. *Med Care* 1996; 34:220-33.
17. EuroQoL Group. EuroQoL: a new facility for the measurement of heath-related quality of life. *Health Policy* 1990. 16:199–208
18. Harvey RF, Bradshaw JM. A simple index of Crohn's disease activity. *Lancet* 1980;1:514.
19. Walmsley RS, Ayres RC, Pounder RE, Allan RN. A simple clinical colitis activity index. *Gut*. 1998 Jul;43(1):29-32.
20. Irvine EJ. Usual therapy improves perianal Crohn's disease as measured by a new disease activity index. McMaster IBD Study Group. *J Clin Gastroenterol* 1995;20:27-32.
21. Schroeder KW, Tremaine WJ, Ilstrup DM. Coated oral 5-aminosalicylic acid therapy for mildly to moderately active ulcerative colitis. A randomized study. *N Engl J Med*. 1987 Dec 24;317(26):1625-9.
22. Rachmilewitz D. Coated mesalazine (5-aminosalicylic acid) versus sulphasalazine in the treatment of active ulcerative colitis: a randomised trial. *BMJ*. 1989 Jan 14;298(6666):82-6.
23. Daperno M, D'Haens G, Van Assche G, Baert F, Bulois P, Maunoury V, Sostegni R, Rocca R, Pera A, Gevers A, Mary JY, Colombel JF, Rutgeerts P. Development and validation of a new, simplified endoscopic activity score for Crohn's disease: the SES-CD. *Gastrointest Endosc*. 2004 Oct;60(4):505-12.
24. Barrett P, Kline P. The observation to variable ratio in factor analysis. *J Personality Group Behaviour* 1981;1:23-33.

- 1  
2  
3 25. Nunnally, J C . Psychometric theory 1978.New York : McGraw-Hill  
4  
5 26. Truelove SC, Witts LJ. Cortisone in ulcerative colitis; final report on a therapeutic  
6  
7 trial. Br Med J. 1955 Oct 29;2(4947):1041-8.  
8  
9  
10 27. Powell-Tuck J, Day DW, Buckell NA, Wadsworth J, Lennard-Jones JE. Correlations  
11  
12 between defined sigmoidoscopic appearances and other measures of disease activity in  
13  
14 ulcerative colitis. Dig Dis Sci. 1982 ;27(6):533-7.  
15  
16 28. Lichtiger S, Present DH. Preliminary report: cyclosporin in treatment of severe active  
17  
18 ulcerative colitis. Lancet. 1990 Jul 7;336(8706):16-9.  
19  
20  
21 29. Hanauer S, Schwartz J, Robinson M, Roufail W, Arora S, Cello J, Safdi M.  
22  
23 Mesalamine capsules for treatment of active ulcerative colitis: results of a controlled  
24  
25 trial. Pentasa Study Group. Am J Gastroenterol. 1993 Aug;88(8):1188-97  
26  
27  
28 30. Levine DS, Riff DS, Pruitt R, Wruble L, Koval G, Sales D, Bell JK, Johnson LK. A  
29  
30 randomized, double blind, dose-response comparison of balsalazide (6.75 g),  
31  
32 balsalazide (2.25 g), and mesalamine (2.4 g) in the treatment of active, mild-to-  
33  
34 moderate ulcerative colitis. Am J Gastroenterol. 2002 Jun;97(6):1398-407.  
35  
36  
37 31. Feagan BG, Greenberg GR, Wild G, Fedorak RN, Paré P, McDonald JW, Dubé R,  
38  
39 Cohen A, Steinhart AH, Landau S, Aguzzi RA, Fox IH, Vandervoort MK. Treatment  
40  
41 of ulcerative colitis with a humanized antibody to the alpha4beta7 integrin. N Engl J  
42  
43 Med. 2005 Jun 16;352(24):2499-507.  
44  
45  
46 32. Seo M, Okada M, Yao T, Ueki M, Arima S, Okumura M. An index of disease activity  
47  
48 in patients with ulcerative colitis. Am J Gastroenterol. 1992 Aug;87(8):971-6.  
49  
50  
51 33. Best WR, Beckett JM, Singleton JW, Kern F Jr. Development of a Crohn's disease  
52  
53 activity index. National Cooperative Crohn's Disease Study. Gastroenterology 19  
54  
55 76 ; 70 : 439 - 444 .  
56  
57  
58  
59  
60

- 1  
2  
3 34. van Hees PA, van Elteren PH, van Lier H J, van Tongeren JH. An index of  
4  
5 inflammatory activity in patients with Crohn's disease. Gut 1980;21:279-286.  
6  
7 35. Wright JP, Marks IN, Parfitt A. A simple clinical index of Crohn's disease activity-  
8  
9 -the Cape Town index. S Afr Med J 1985;68: 502-503.  
10  
11 36. Present DH, Rutgeerts P, Targan S, Hanauer SB, Mayer L, van Hogezaand RA,  
12  
13 Podolsky DK, Sands BE, Braakman T, DeWoody KL, Schaible TF, van Deventer  
14  
15 SJ. Infliximab for the treatment of fistulas in patients with Crohn's disease. N  
16  
17 Engl J Med 1999;340:1398 -1405.  
18  
19 37. Pikarsky AJ, Gervaz P, Wexner SD. Perianal Crohn disease: a new scoring system to  
20  
21 evaluate and predict outcome of surgical intervention. Arch Surg. 2002  
22  
23 Jul;137(7):774-7  
24  
25  
26  
27  
28  
29  
30  
31  
32  
33  
34  
35  
36  
37  
38  
39  
40  
41  
42  
43  
44  
45  
46  
47  
48  
49  
50  
51  
52  
53  
54  
55  
56  
57  
58  
59  
60

**Appendices:****Table 1: The commonly used clinical severity indices in literature****Ulcerative Colitis:**

1. Truelove and Witts severity index <sup>26</sup>
2. Powell Tuck index <sup>27</sup>
3. Simple clinical colitis severity index <sup>19</sup>
4. Lichtiger score <sup>28</sup>
5. Clinical Activity Index (CAI) <sup>22</sup>
6. Physician global assessment <sup>29</sup>
7. Improvement based on individual symptom score <sup>30</sup>
8. Ulcerative colitis clinical severity score <sup>31</sup>
9. Seo Score <sup>32</sup>
10. Mayo Clinic activity score <sup>21</sup>

**Crohn's disease:**

1. Crohn's disease activity index <sup>33</sup>
2. Harvey Bradshaw index <sup>18</sup>
3. Van Hees index <sup>34</sup>
4. The Cape Town Index <sup>35</sup>
5. Fistula Drainage assessment <sup>36</sup>
6. Perianal Disease Activity Index (PDAI) <sup>37</sup>
7. Perianal Crohn's disease Activity Index (PCDAI) <sup>20</sup>
